# Supplementary material for: Alkaloids and Styryl lactones from Goniothalamus ridleyi King and Their α-Glucosidase Inhibitory Activity
Source: MDPI journal article supplement (doi:10.3390/molecules28031158), 2023-01-24
Supplement: s1 [file s1]

## SUPPLEMENTARY MATERIALS

### Alkaloids and styryllactones from *Goniothalamus ridleyi* King and their $\alpha$ -glucosidase inhibitory activity

Isaraporn Polbuppha<sup>1</sup>, Passakorn Teerapongpisan<sup>1</sup>, Piyaporn Phukhatmuen<sup>1</sup>, Virayu Suthiphasilp<sup>2</sup>, Tharakorn Maneerat<sup>1,3</sup>, Rawiwan Charoensup<sup>3,4</sup>, Raymond J. Andersen<sup>5,\*</sup> and Surat Laphookhieo<sup>1,3,\*</sup>

<sup>1</sup>Center of Chemical Innovation for Sustainability (CIS) and School of Science, Mae Fah Luang University, Chiang Rai 57100, Thailand

<sup>2</sup>Department of Industrial Technology and Innovation Management, Faculty of Science and Technology, Pathumwan Institute of Technology, Bangkok 10330, Thailand

<sup>3</sup>Medicinal Plant Innovation Center of Mae Fah Luang University, Chiang Rai 57100, Thailand

<sup>4</sup>School of Integrative Medicine, Mae Fah Luang University, Chiang Rai 57100, Thailand

<sup>5</sup>Department of Chemistry and Department of Earth, Ocean & Atmospheric Sciences, University of British Columbia, 2036, Main Mall, Vancouver, BC, V6T 1Z1, Canada

**Abstract:** Gonioridleylactam (**1**), an undescribed compound, is a unique dimeric aristolactam isolated from the EtOAc extract of the twigs of *Goniothalamus ridleyi* King. The structure of gonioridleylactam (**1**) consists of two different aristolactams jointed together *via* two methylenedioxy bridges at C-3/C-3' and C-4/C-4' generating a ten-membered ring of [1,3,6,8]tetraoxecine. An undescribed natural product, gonioridleyindole (3-hydroxymethyl-1-methyl-1*H*-benz[*f*]indole-4,9-dione, **2**), together with eight known compounds (**3-10**) were also isolated from this plant. Their structures were extensively characterized by spectroscopic methods and comparisons made from the literature. Compounds **1-4**, **7**, and **9** were evaluated for their  $\alpha$ -glucosidase inhibitory activity. Of these, 3,5-demethoxypiperolide (**7**) displayed the highest  $\alpha$ -glucosidase inhibitory activity with an IC<sub>50</sub> value of 1.25  $\mu$ M.

\* Correspondence:

Assoc. Prof. Dr. Surat Laphookhieo (S.L.); e-mail: [surat.lap@mfu.ac.th](mailto:surat.lap@mfu.ac.th)

Prof. Dr. Raymond J. Andersen (R.J.A.); e-mail address: [raymond.andersen@ubc.ca](mailto:raymond.andersen@ubc.ca)

| <b>Contents</b>                                                                                                                                           | <b>Page</b> |
|-----------------------------------------------------------------------------------------------------------------------------------------------------------|-------------|
| <b>Figure S1</b> <sup>1</sup> H NMR (600 MHz, acetone- <i>d</i> <sub>6</sub> ) of gonioridleyilactam ( <b>1</b> )                                         | 6           |
| <b>Figure S2</b> <sup>13</sup> C NMR (150 MHz, acetone- <i>d</i> <sub>6</sub> ) of gonioridleyilactam ( <b>1</b> )                                        | 7           |
| <b>Figure S3</b> HSQC of gonioridleyilactam ( <b>1</b> )                                                                                                  | 7           |
| <b>Figure S4</b> HMBC of gonioridleyilactam ( <b>1</b> )                                                                                                  | 8           |
| <b>Figure S5</b> COSY of gonioridleyilactam ( <b>1</b> )                                                                                                  | 8           |
| <b>Figure S6</b> NOESY of gonioridleyilactam ( <b>1</b> )                                                                                                 | 9           |
| <b>Figure S7</b> LRESIMS (Low-resolution electrospray ionisation mass spectrometry) spectrum of gonioridleyilactam ( <b>1</b> )                           | 9           |
| <b>Figure S8</b> HRESIMS spectrum of gonioridleyilactam ( <b>1</b> )                                                                                      | 10          |
| <b>Figure S9</b> HRESIMS spectrum of Unit A (aristolactam II) in <b>1</b>                                                                                 | 10          |
| <b>Figure S10</b> HRESIMS spectrum of Unit B (aristolactam I) in <b>1</b>                                                                                 | 11          |
| <b>Figure S11</b> IR spectrum of gonioridleyilactam ( <b>1</b> )                                                                                          | 11          |
| <b>Figure S12</b> <sup>1</sup> H NMR (400 MHz, CDCl <sub>3</sub> ) of 3-hydroxymethyl-1-methyl-1 <i>H</i> -benz[ <i>f</i> ]indole-4,9-dione ( <b>2</b> )  | 12          |
| <b>Figure S13</b> <sup>13</sup> C NMR (100 MHz, CDCl <sub>3</sub> ) of 3-hydroxymethyl-1-methyl-1 <i>H</i> -benz[ <i>f</i> ]indole-4,9-dione ( <b>2</b> ) | 12          |
| <b>Figure S14</b> HSQC of 3-hydroxymethyl-1-methyl-1 <i>H</i> -benz[ <i>f</i> ]indole-4,9-dione ( <b>2</b> )                                              | 13          |
| <b>Figure S15</b> HMBC of 3-hydroxymethyl-1-methyl-1 <i>H</i> -benz[ <i>f</i> ]indole-4,9-dione ( <b>2</b> )                                              | 13          |
| <b>Figure S16</b> COSY of 3-hydroxymethyl-1-methyl-1 <i>H</i> -benz[ <i>f</i> ]indole-4,9-dione ( <b>2</b> )                                              | 14          |
| <b>Figure S17</b> NOESY of 3-hydroxymethyl-1-methyl-1 <i>H</i> -benz[ <i>f</i> ]indole-4,9-dione ( <b>2</b> )                                             | 14          |
| <b>Figure S18</b> HRESIMS spectrum of 3-hydroxymethyl-1-methyl-1 <i>H</i> -benz[ <i>f</i> ]indole-4,9-dione ( <b>2</b> )                                  | 15          |
| <b>Figure S19</b> IR spectrum of 3-hydroxymethyl-1-methyl-1 <i>H</i> -benz[ <i>f</i> ]indole-4,9-dione ( <b>2</b> )                                       | 15          |
| <b>Figure S20</b> The isolation and purification of isolated compounds <b>1-10</b> from the twig extract of <i>G. ridleyi</i> .                           | 16          |

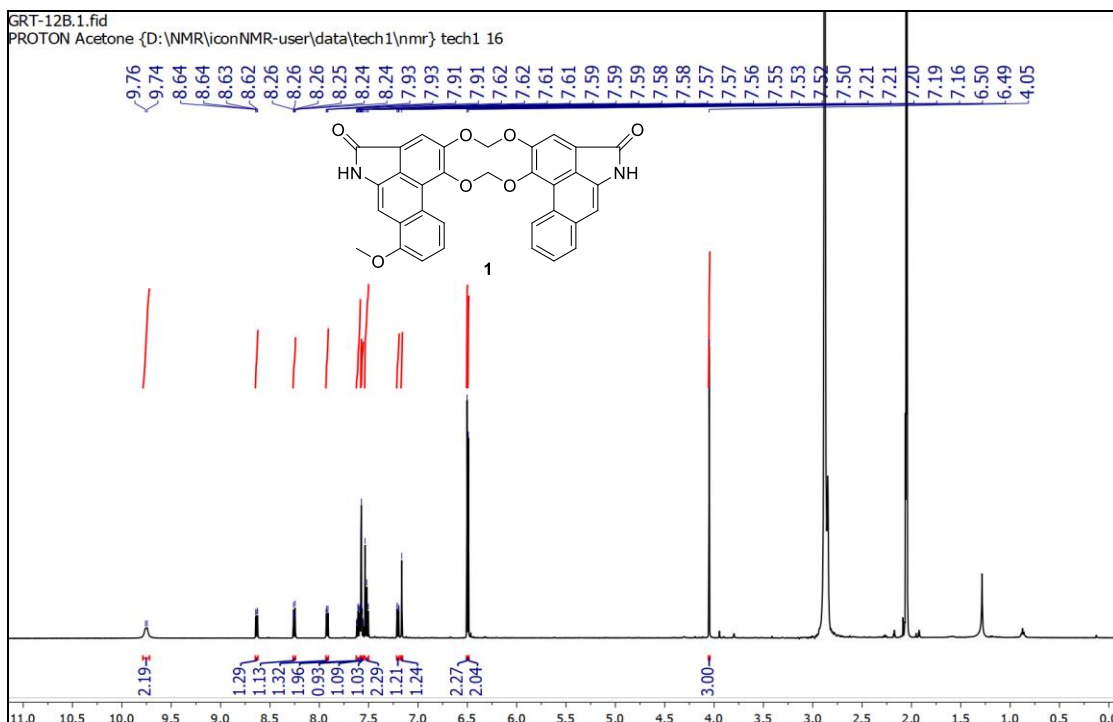

**Figure S1**  $^1\text{H}$  NMR (600 MHz, acetone- $d_6$ ) of gonioridleyilactam (**1**)

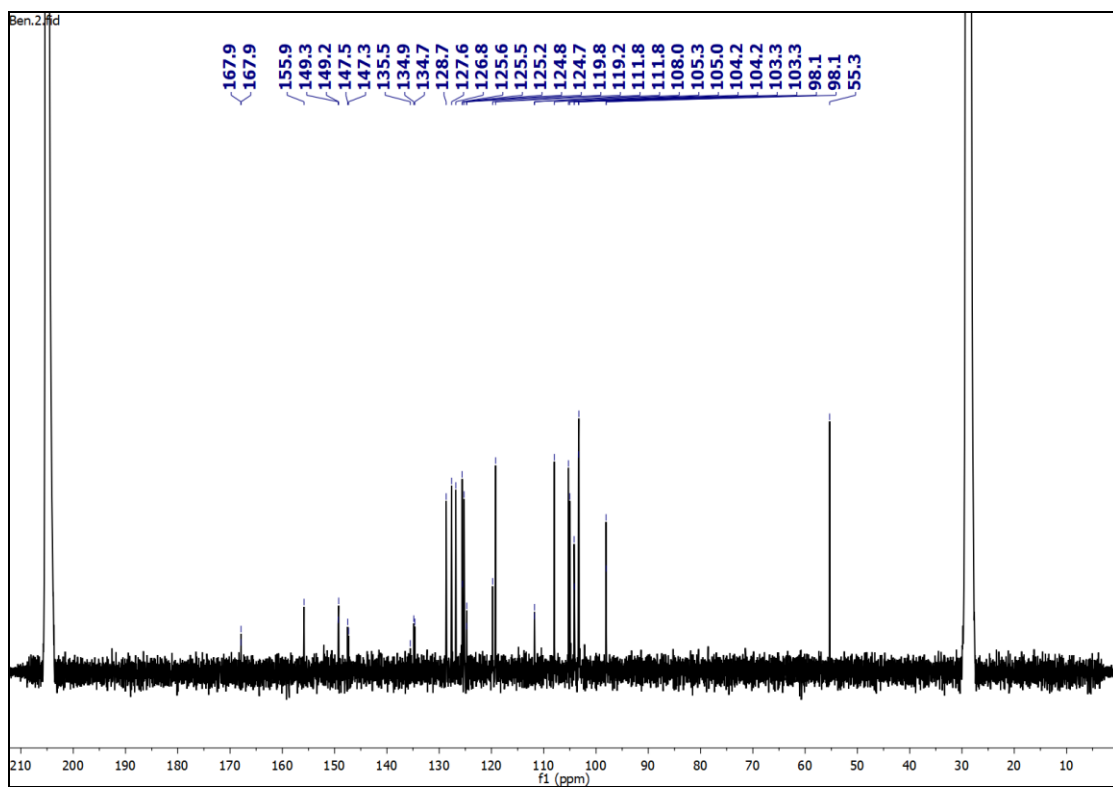

**Figure S2**  $^{13}\text{C}$  NMR (125 MHz, acetone- $d_6$ ) of gonioridleyilactam (**1**)

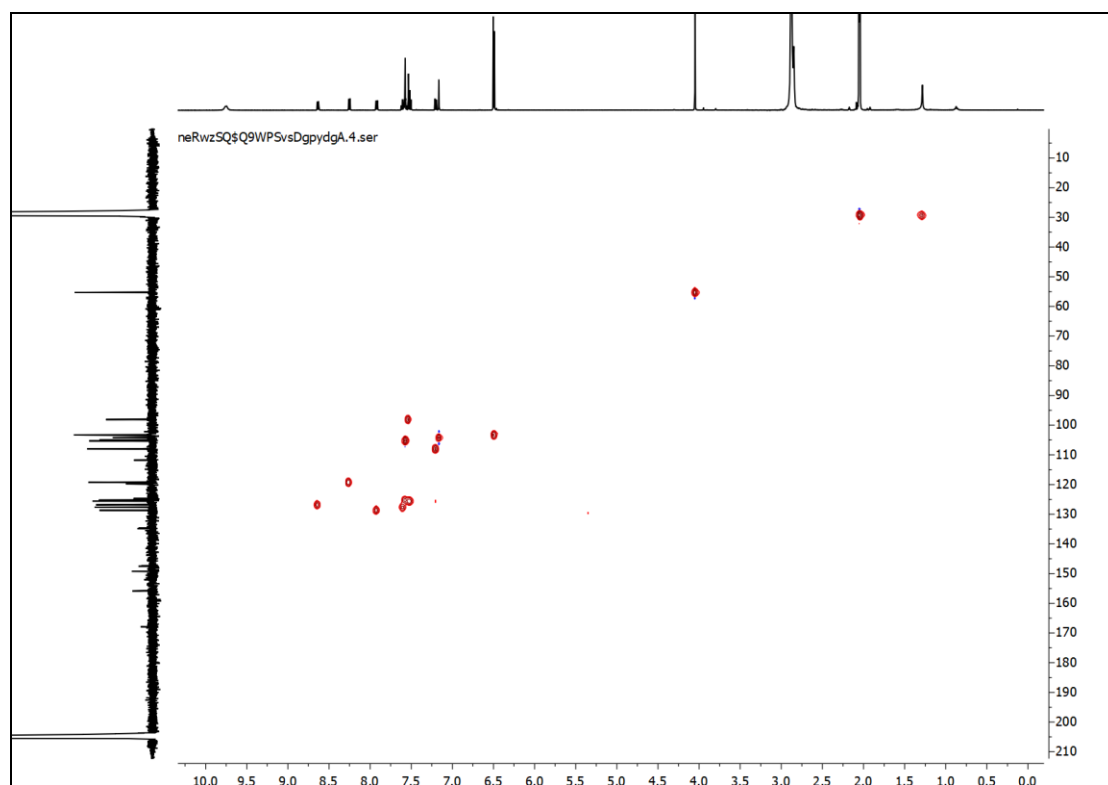

**Figure S3 HSQC of gonioridleyilactam (1)**

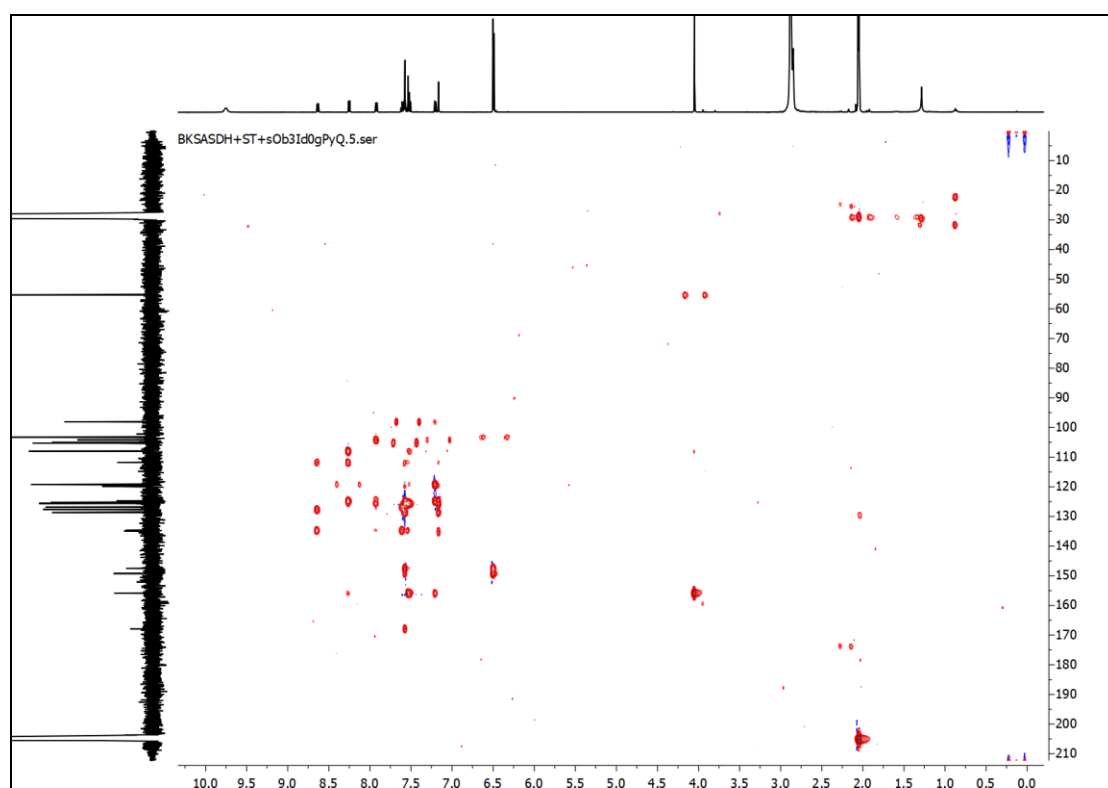

**Figure S4 HMBC of gonioridleyilactam (1)**

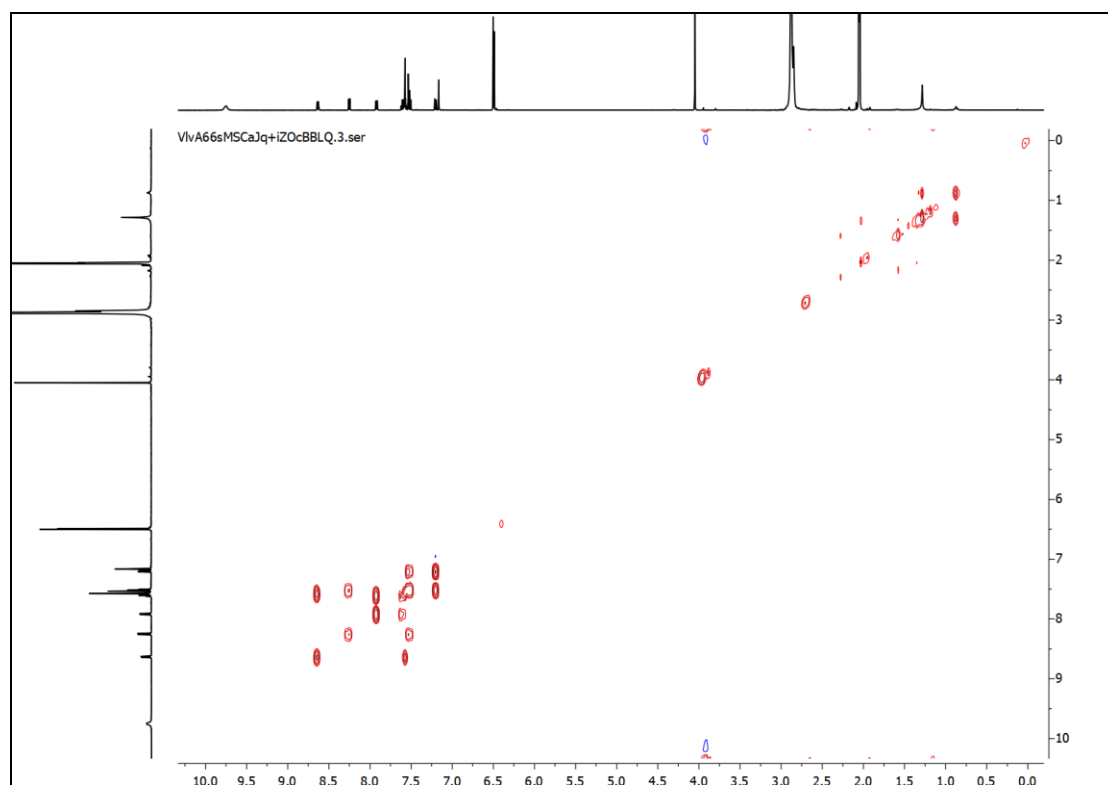

**Figure S5** COSY of gonioridleylactam (**1**)

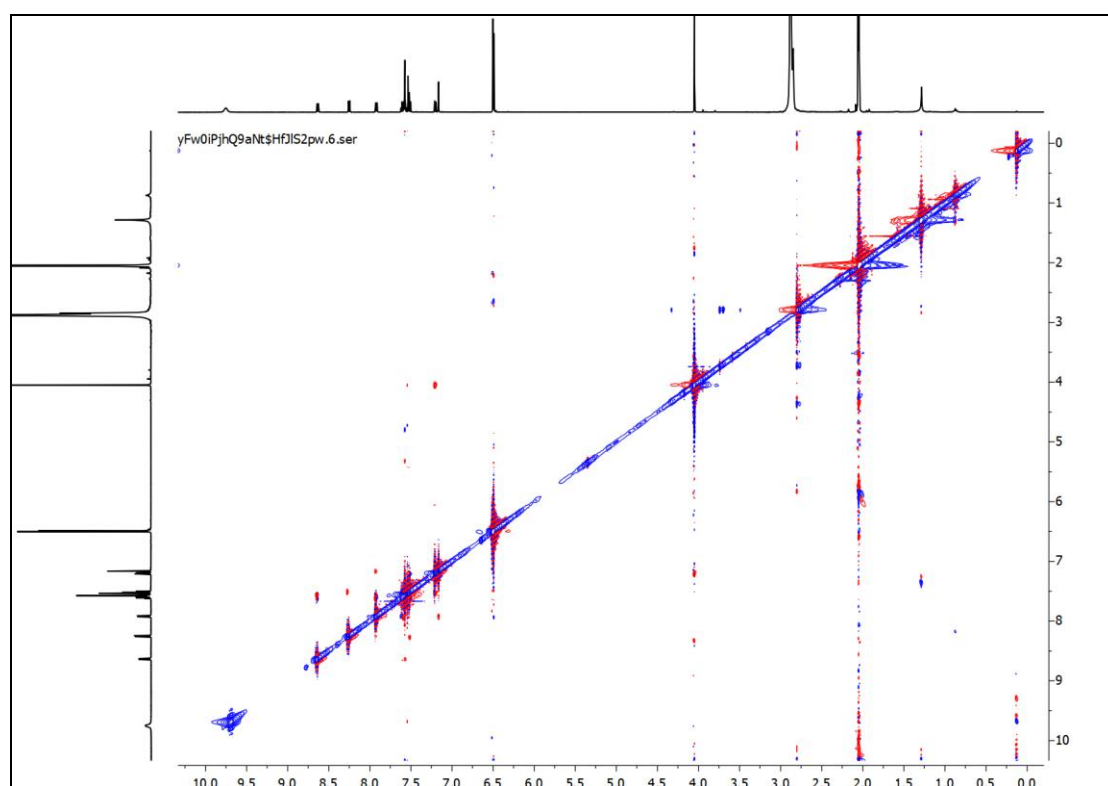

**Figure S6** NOESY of gonioridleylactam (**1**)

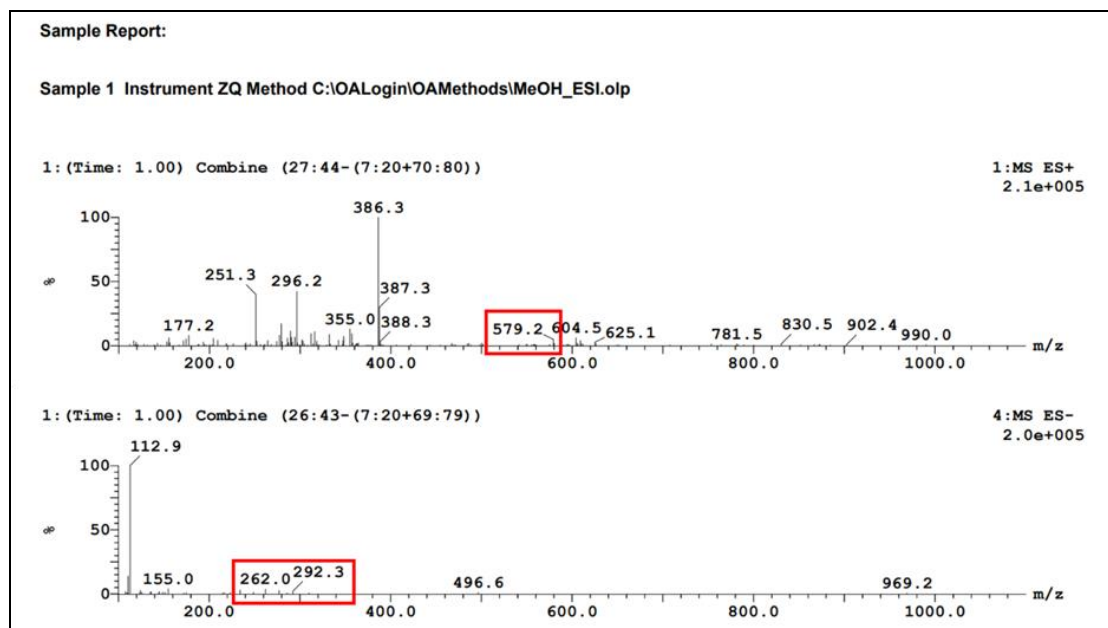

**Figure S7** LRESIMS (Low-resolution electrospray ionisation mass spectrometry) spectrum of gonioridleyilactam (**1**)

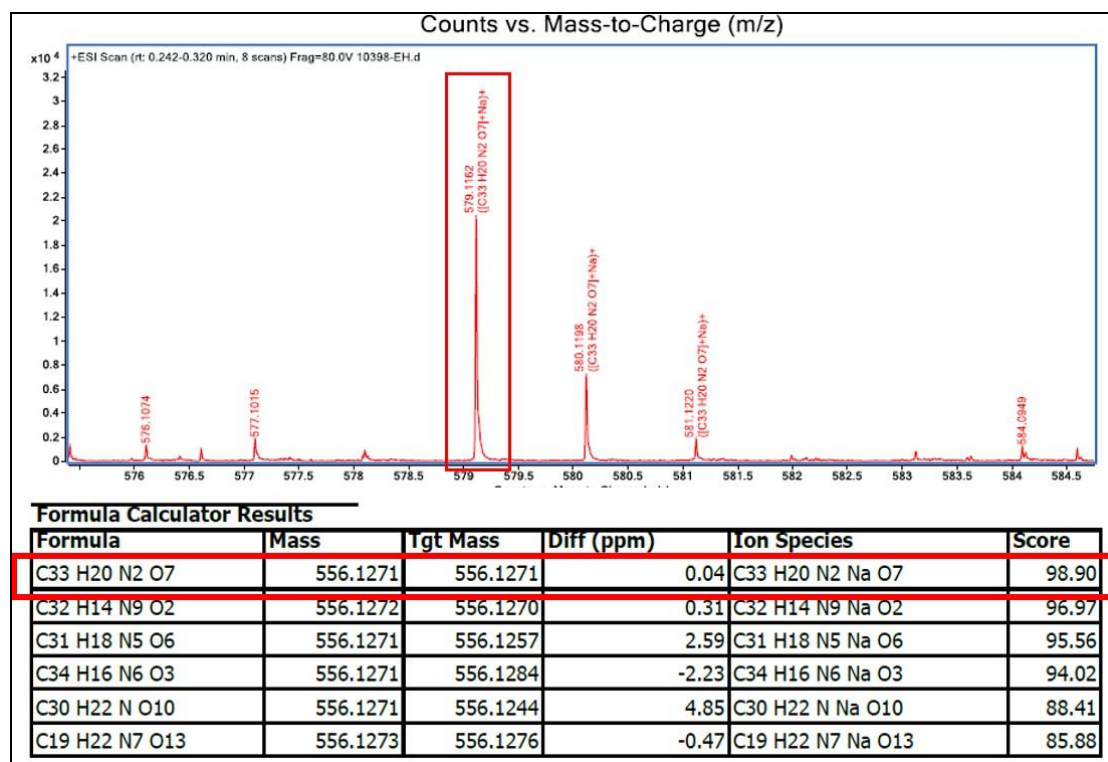

**Figure S8** HRESIMS spectrum of gonioridleyilactam (**1**)

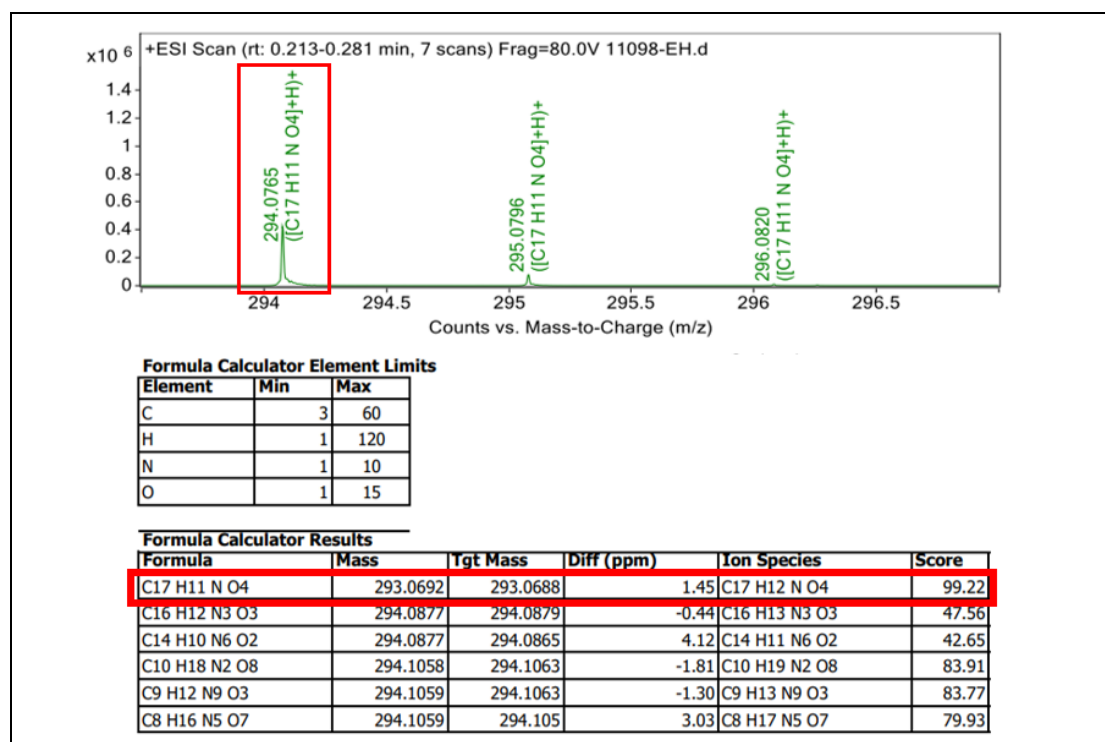

Figure S9 HRESIMS spectrum of aristolactam unit A of **1**

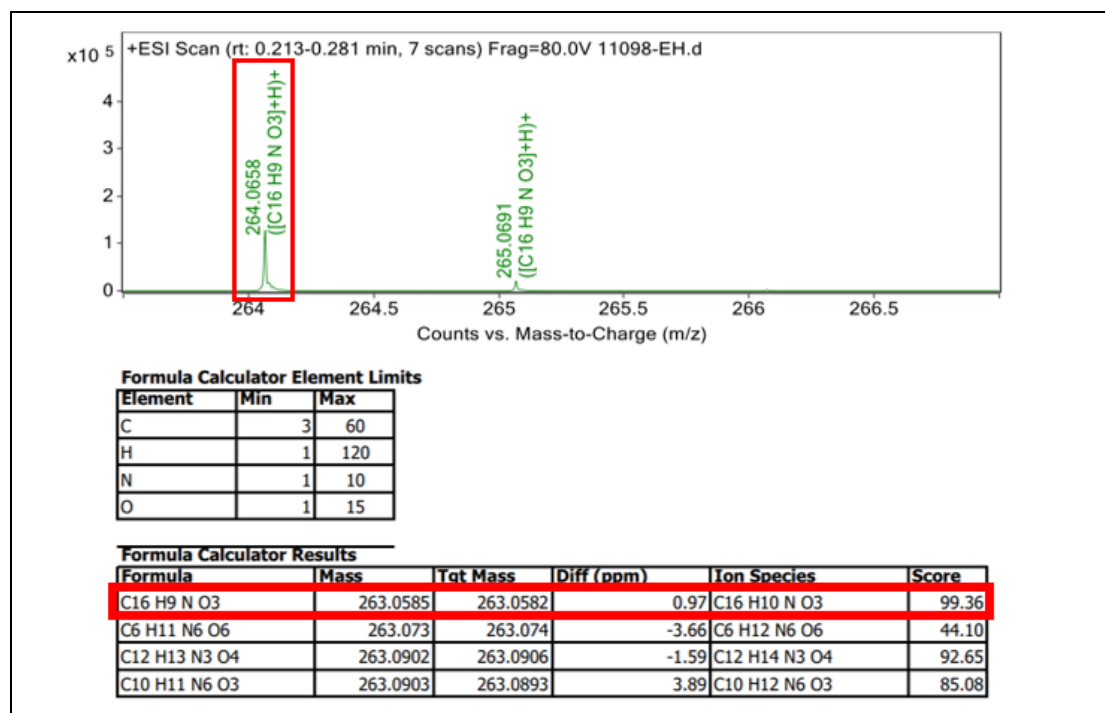

Figure S10 HRESIMS spectrum of aristolactam unit B of **1**

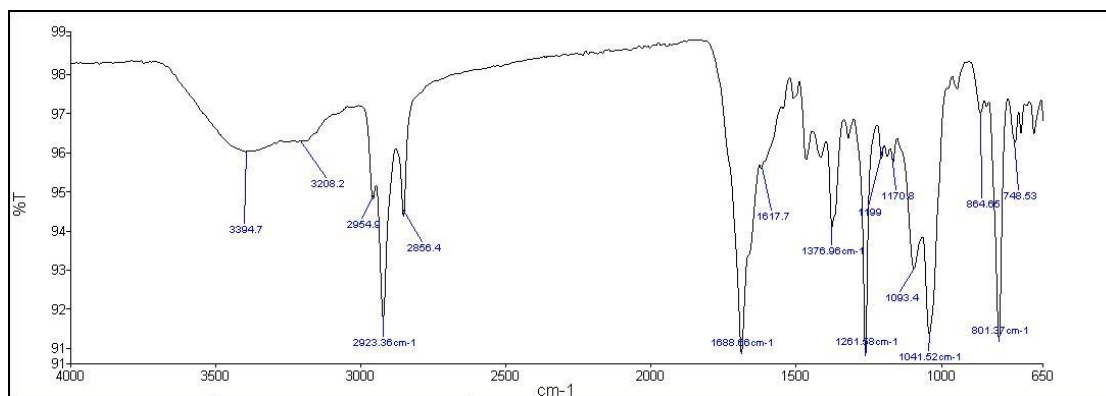

**Figure S11** IR spectrum of gonioridleylactam (**1**)

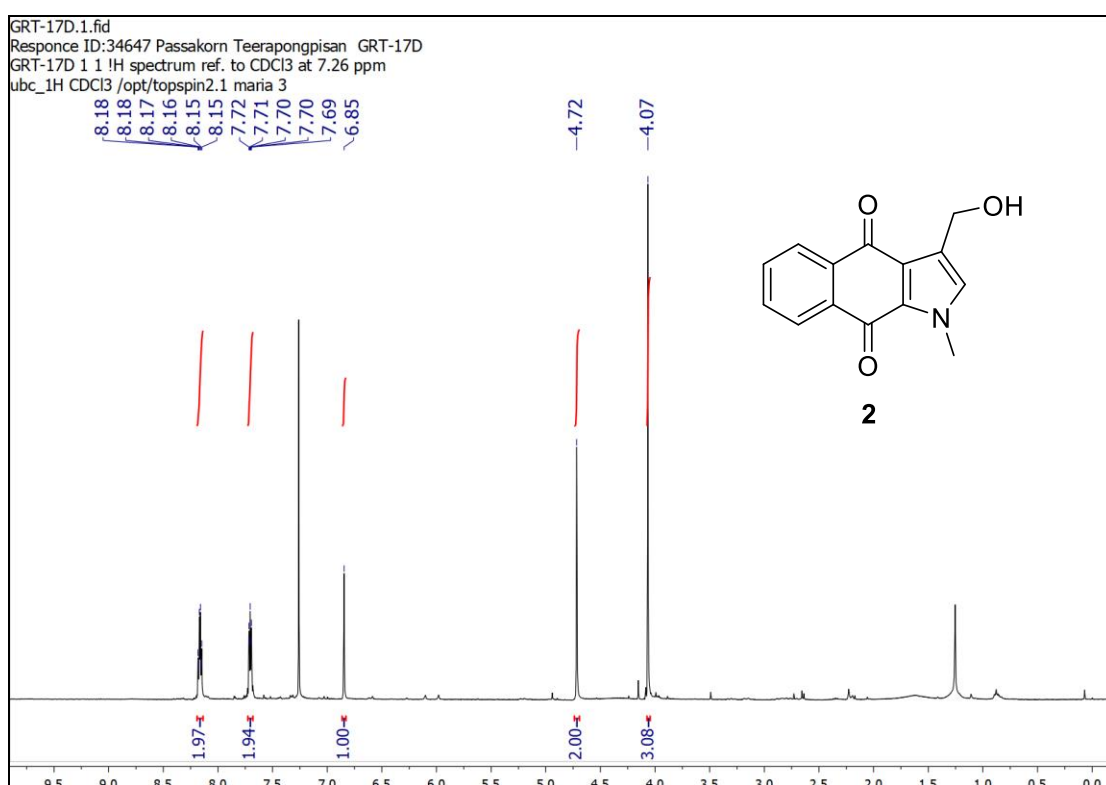

**Figure S12**  $^1\text{H}$  NMR (400 MHz,  $\text{CDCl}_3$ ) of  
3-hydroxymethyl-1-methyl-1*H*-benz[*f*]indole-4,9-dione (**2**)



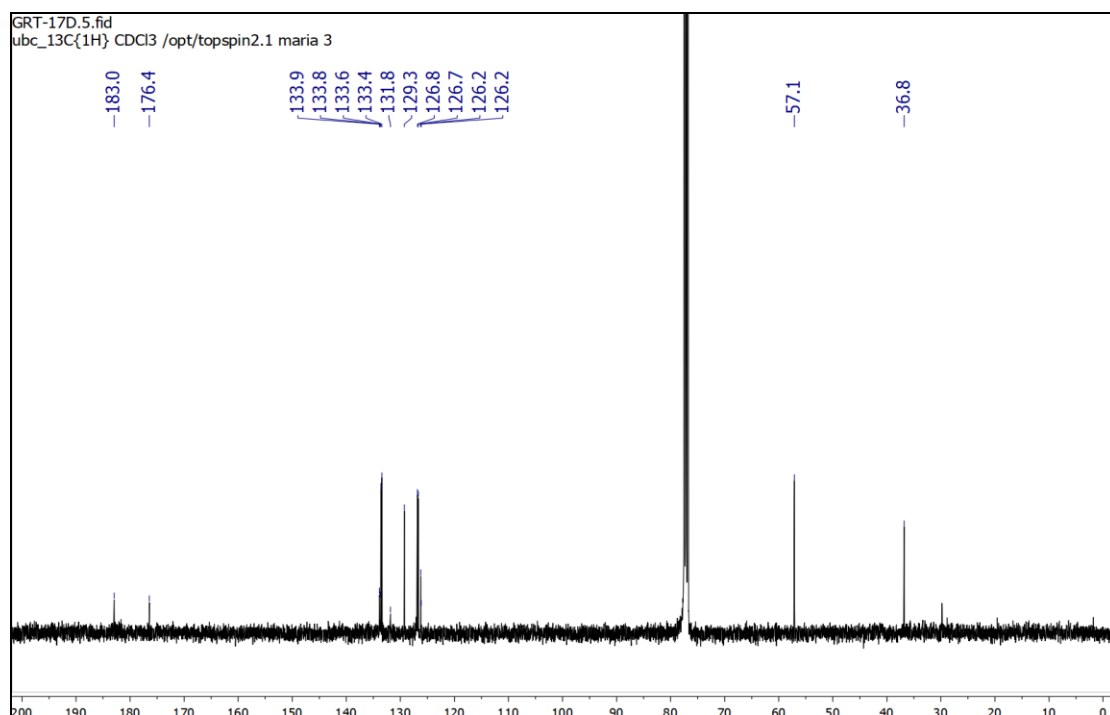

**Figure S13**  $^{13}\text{C}$  NMR (100 MHz,  $\text{CDCl}_3$ ) of  
3-hydroxymethyl-1-methyl-1*H*-benz[*f*]indole-4,9-dione (**2**)

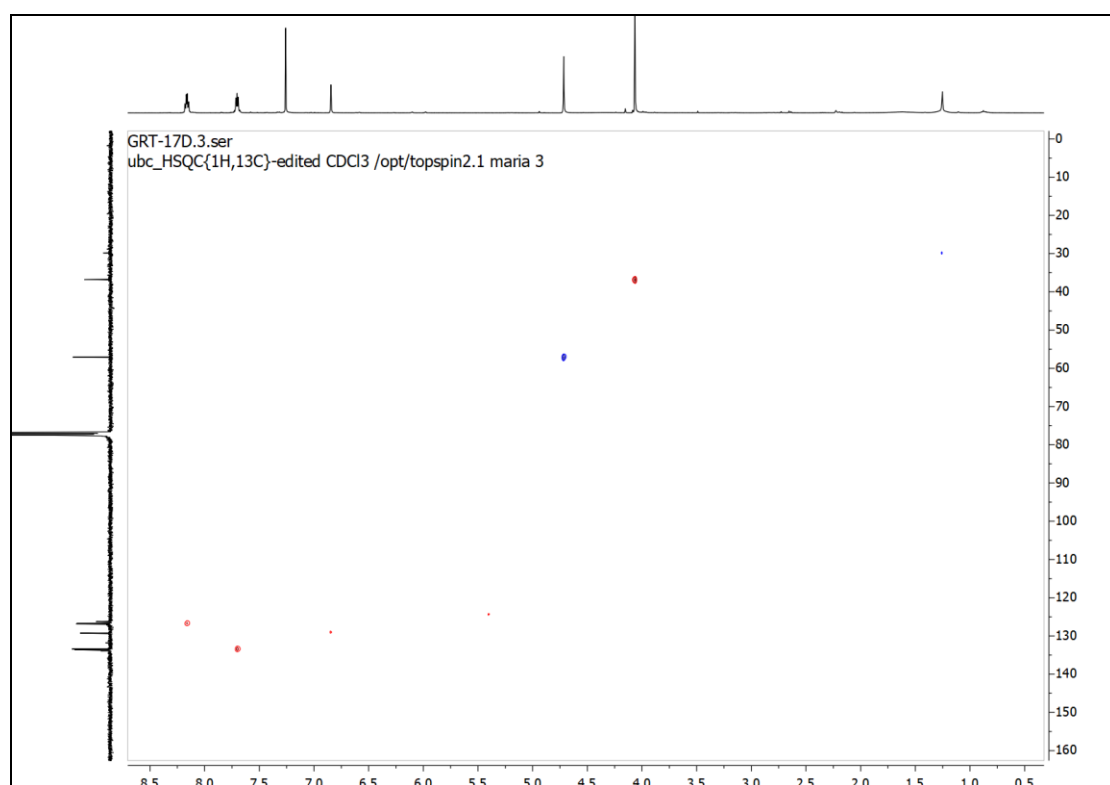

**Figure S14** HSQC of 3-hydroxymethyl-1-methyl-1*H*-benz[*f*]indole-4,9-dione (**2**)

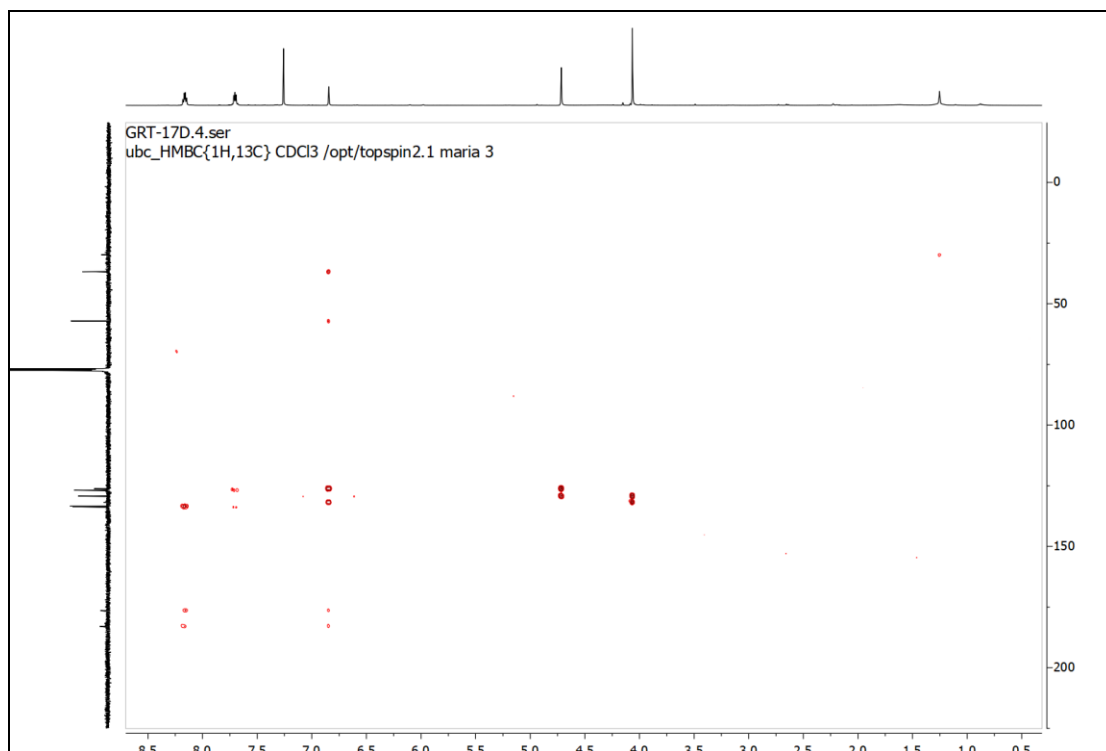

**Figure S15** HMBC of 3-hydroxymethyl-1-methyl-1*H*-benz[*f*]indole-4,9-dione (**2**)

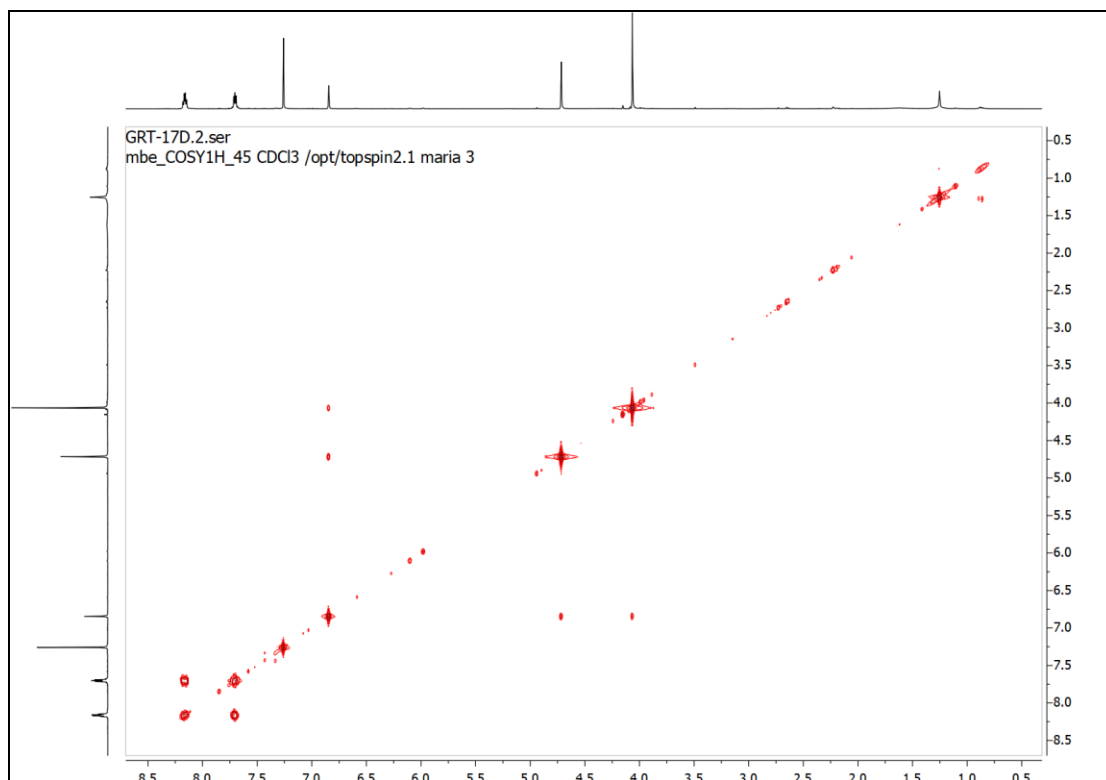

**Figure S16** COSY of 3-hydroxymethyl-1-methyl-1*H*-benz[*f*]indole-4,9-dione (**2**)

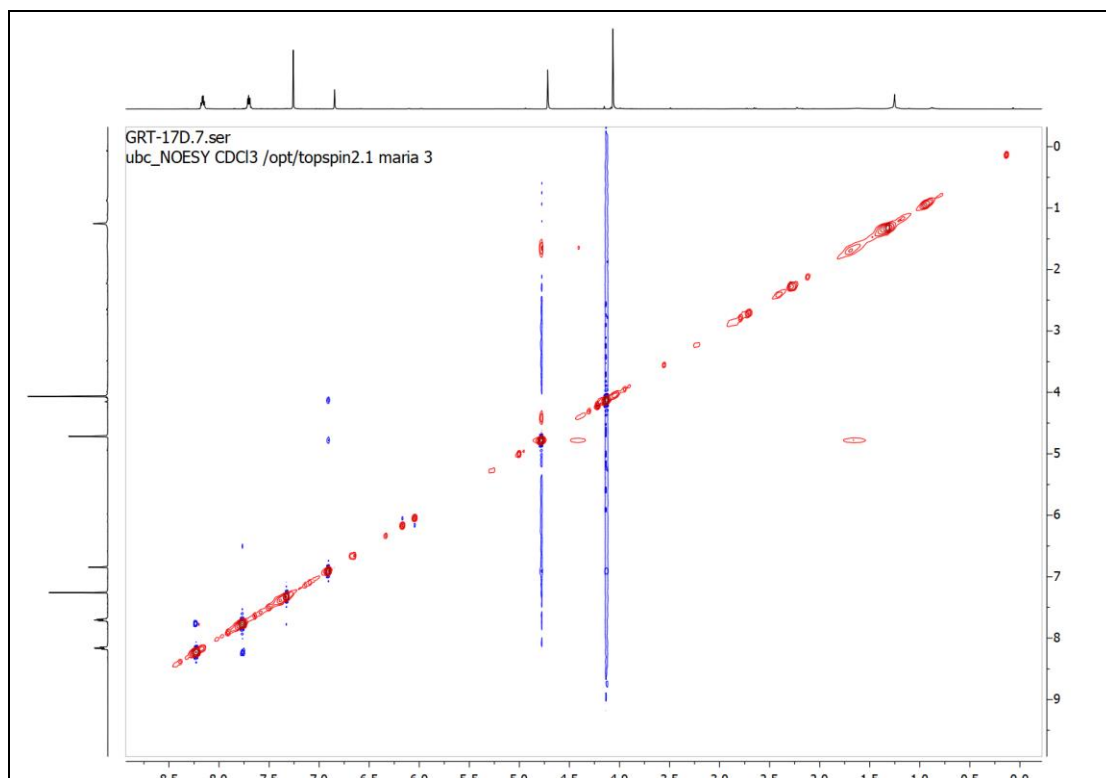

**Figure S17** NOESY of 3-hydroxymethyl-1-methyl-1*H*-benz[*f*]indole-4,9-dione (**2**)

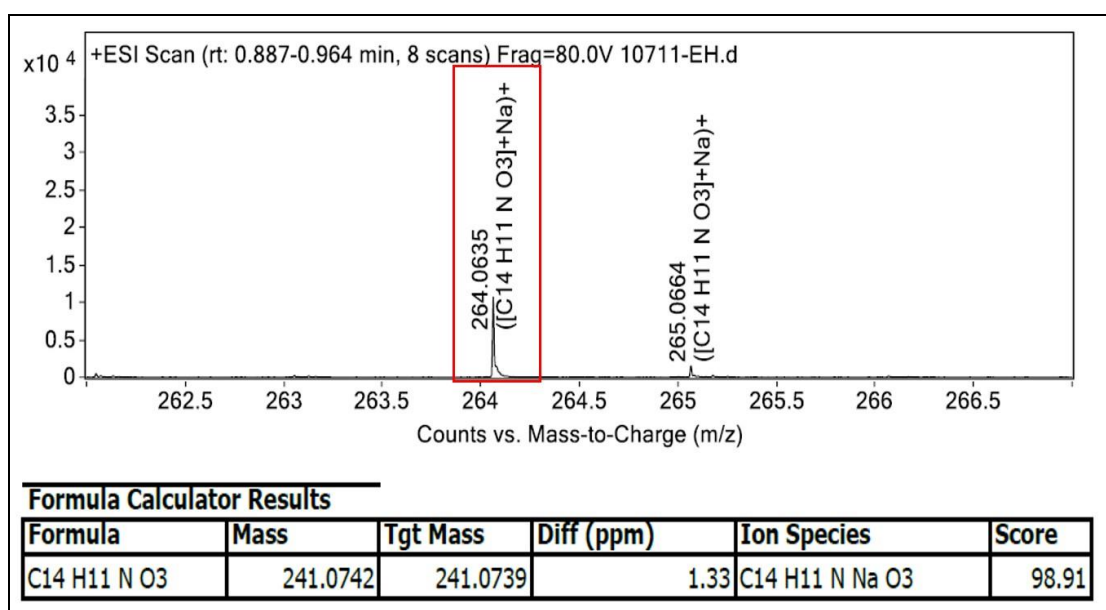

**Figure S18** HRESIMS spectrum of 3-hydroxymethyl-1-methyl-1*H*-benz[*f*]indole-4,9-dione (**2**)

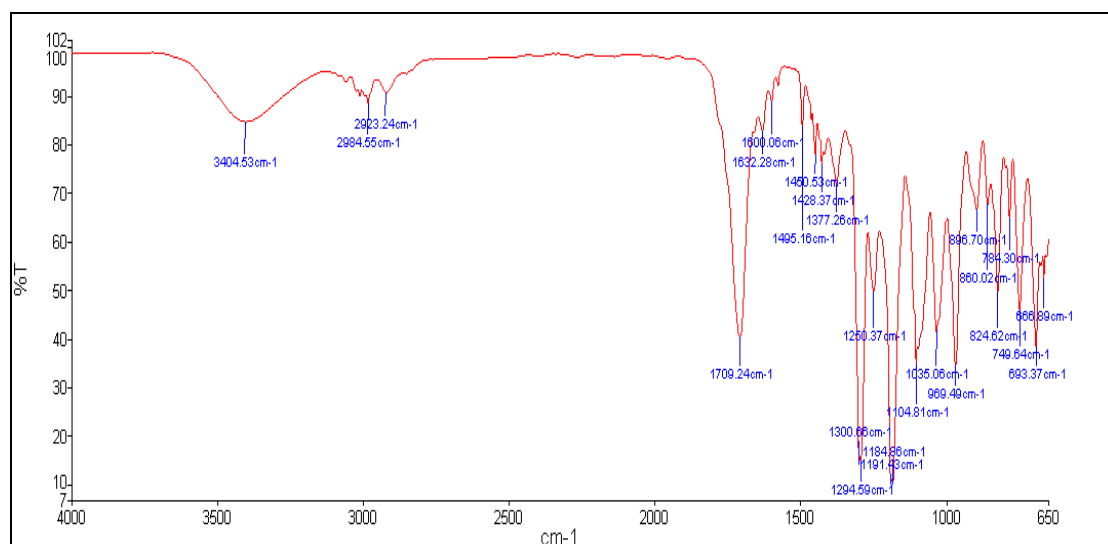

**Figure S19** IR spectrum of 3-hydroxymethyl-1-methyl-1*H*-benz[*f*]indole-4,9-dione (**2**)

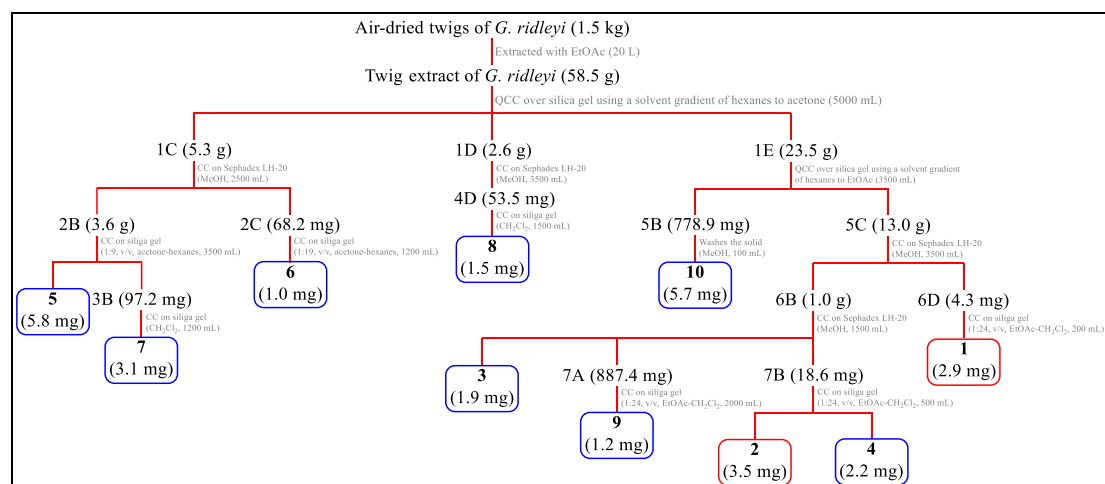

**Figure S20** The isolation and purification of isolated compounds **1-10** from the twig extract of *G. ridleyi*
